# Supplementary material for: Exploratory study on the effect of osteoactivin on muscle regeneration in a rat volumetric muscle loss model
Source: PLoS One. 2017 Apr 20;12(4):e0175853. doi: 10.1371/journal.pone.0175853 (PMC5398551; doi:10.1371/journal.pone.0175853)
Supplement: S1 File — (XLSX) [file pone.0175853.s001.xlsx]

## Sheet: OA in vitro release ELISA
OA concentration (ug/ml) from ELISA	Total supernatant (ul)	OA in the supernatant (ug)	total OA from last time	Total released OA (ug)	Percentage (%)	AVG	STD
0.0179768	500	0.0089884	0.025171	0.0341594	3.41594	3.57115	0.262234
0.0207848	500	0.0103924	0.0238436	0.034236	3.4236
0.021904	500	0.010952	0.0277872	0.0387392	3.87392
0.658026	500	0.329013	0.265678	0.594691	5.94691	7.51968	2.82833
0.455273	500	0.227637	0.355094	0.582731	5.82731
0.917258	500	0.458629	0.619854	1.07848	10.7848

## Sheet: TA Muscle CSA
	2 wks Normal		4 wks Normal		2 wks Gel Only		4 wks Gel Only		2 wk Low OA		4 wk Low OA		2 wk High OA		4 wk High OA
	TA28L	105.2	TA29L	98.5	TA26R	61.8	TA30 R	69.5	TA26L	88.3	TA23 L	100.2	TA24L	75.7	TA20 L	68.6
	TA28R	91.5	TA29R	122.8	TA27R	88.8	TA20 R	91.3	TA27L	86.5	TA22L	86.5	TA25L	87	TA21 L	42.9
					TA24R	91.4	TA21 R	84.5
					TA25R	76.3	TA22R	71.4
	Average	98.35		110.65		79.58		79.18		87.4		93.35		81.35		55.75
	SD	9.69		17.18		13.56		10.48		1.27		9.69		7.99		18.17

## Sheet: CD68 Score
1ug OA 2 wks	CD68 (periphery)	CD68 (Center)	10ug OA 2 wks	CD68 (periphery)	CD68 (Center)	1ug OA 4 wks	CD68 (periphery)	CD68 (Center)	10 ug OA 4wks	CD68 (periphery)	CD68 (Center)
TA19 Left	2	1	TA16 Left	2	2	TA22 Left	1	1	TA17 Left	1	1
TA26 Left	1	1	TA24 Left	1	1	TA23 Left	2	2	TA20 Left	1	3
TA27 Left	2	1	TA25 Left	4	1	TA30 Left	1	3	TA21 Left	1	3
TA19 Right	3	1	TA16 Right	3	1	TA22 Right	1	1	TA17 Right	1	1
TA26 Right	1	1	TA24 Right	3	2	TA23 Right	2	3	TA20 Right	3	1
TA27 Right	1	1	TA25 Right	3	2	TA30 Right	1	2	TA21 Right	1	2
1ug OA 2 wks	CD68 (periphery)	CD68 (Center)	10ug OA 2 wks	CD68	CD68 (Center)	1ug OA 4 wks	CD68	CD68 (Center)	10 ug OA 4wks	CD68	CD68 (Center)
TA19 Left	5	1	TA16 Left	5	2	TA22 Left	4	1	TA17 Left	4	1
TA26 Left	4	1	TA24 Left	4	1	TA23 Left	5	2	TA20 Left	4	3
TA27 Left	5	1	TA25 Left	7	1	TA30 Left	4	3	TA21 Left	4	3
TA19 Right	6	1	TA16 Right	6	1	TA22 Right	4	1	TA17 Right	4	1
TA26 Right	4	1	TA24 Right	6	2	TA23 Right	5	3	TA20 Right	6	1
TA27 Right	4	1	TA25 Right	6	2	TA30 Right	4	2	TA21 Right	4	2
	High OA				Low OA				Low control				High control			Treatment	No treament
		STD			Periphery	STD			Periphery	STD			Periphery	STD		Periphery	STD
2 wk Periphery	5.33333	1.52753			4.66667	0.57735			4.66667	1.1547			6	0	Low	4.5	0.547723
4 wk Periphery	4	0			4.33333	0.57735			4.33333	0.57735			4.66667	1.1547	control	4.5	0.83666
	Center	STD			Center	STD			Center	STD			Center	STD		Periphery	STD
2 wk center	1.33333	0.57735			1	0			1	0			1.66667	0.57735	High	4.66667	1.21106
4 wk center	2.33333	1.1547			2	1			2	1			1.33333	0.57735	control	5.33333	1.0328

## Sheet: Gel Resorption
Step Level				Step Level (mm)	0.5		Step Level (mm)	1		Step Level (mm)	1.5		Step Level (mm)	2		Step Level (mm)	2.5		Step Level (mm)	3		Step Level (mm)	3.5		Step Level (mm)	4		Step Level (mm)	4.5		Step Level (mm)			Avg Gel			Average	SD
2wk	TA16L	L	High	0.5	0	11.6	1	10.7	22.5	1.5	13.3	29.5	2	8.5	21.4	2.5	11.2	26.4	3	3.4	19.2	3.5			4			4.5			5			9.42		2 wk gel only	20.49	3.91
2wk	TA24L	L	High	0.5			1		6.1	1.5	6.7	12.8	2	10.1	16.3	2.5	12.7	19.1	3	14.8	22.6	3.5	14.2	23.4	4	8.2	21.2	4.5			5			11.1167		4 wk gel only	7.35	0.98
2wk	TA25L	L	High	0.5			1			1.5			2			2.5			3	21.9	38.5	3.5	27.5	38.9	4			4.5			5			24.7		2 wk Low OA	19.7872	7.34
2wk	TA19L	L	Low	0.5			1			1.5			2			2.5	28.6	35.2	3	30.5	39.8	3.5	25.6	36.2	4			4.5			5			28.2333		4 wk Low OA	8.2	5.59
2wk	TA26L	L	Low	0.5			1			1.5			2			2.5			3	14.9	18.6	3.5	14.9		4	18.6		4.5	17.5		5	14.8		16.14		2 wk High OA	15.08	8.38
2wk	TA27L	L	Low	0.5			1			1.5	15.9		2	18.5	26.7	2.5	18	27.3	3	19.03		3.5	15.7		4	2.8		4.5			5			14.9883		4 wk High OA	8.47	1.64
2wk	TA16R	R	None	0.5			1			1.5			2			2.5			3			3.5	30.5	41.2	4	32.4	41.9	4.5	30.6	41.9	5			31.1667
2wk	TA19R	R	None	0.5			1			1.5			2	12.7		2.5	20.5		3	22.8		3.5	25.5	44.5	4	27.6	45.2	4.5	23.7		5			22.1333
2wk	TA26R	R	None	0.5			1			1.5			2			2.5			3	6.2		3.5	11.6		4	14.9	21.8	4.5	16.7	21.4	5	13.5		12.58
2wk	TA27R	R	None	0.5			1			1.5	9.6		2	19.1		2.5	24.7		3	24.2	29	3.5	26.7	31	4	24.8		4.5	23.3		5			21.7714
2wk	TA24R	R	None	0.5			1			1.5			2			2.5						6	11		6.5	16.6		7	17.4		7.5	19.4		16.1
2wk	TA25R	R	None	0.5			1			1.5			2	21.7		2.5	23.3		3	25.4	34.3	3.5	24.8		4	22.8		4.5			5			23.6
4wk	TA20 Left	L	High	0.5			1	5.9	10	1.5	8.8	15	2	7.9		2.5			3			3.5			4			4.5			5			7.53333
4wk	TA21 Left	L	High	0.5			1			1.5			2			2.5	7.1		3	10.7		3.5	14	18.1	4	12.6		4.5	7.4		5			10.36
4wk	TA17L	L	High	0.5			1	3.9		1.5	11		2	10		2.5	10		3	2.7		3.5			4			4.5			5			7.52
4wk	TA23 Left	L	Low	0.5			1			1.5			2			2.5			3			3.5			4	11.5		4.5	13		5	11.3		11.9333
4wk	TA30 Left	L	Low	0.5			1			1.5			2	1		2.5	2.4		3	3		3.5	1.5		4	1		4.5			5			1.78
4wk	TA22L	L	Low	0.5			1			1.5			2	9.5		2.5	12.1		3	11.1		3.5			4			4.5			5			10.9
4wk	TA23 Right	R	None	0.5			1			1.5	3.2		2	10.3		2.5	14.1		3	15.8		3.5	10.7		4			4.5			5			10.82
4wk	TA30 Right	R	None	0.5			1			1.5			2			2.5			3			3.5	1.8		4	1.4		4.5			5			1.6
4wk	TA20 Right	R	None	0.5			1			1.5	2.1		2	2.6		2.5	0.6		3			3.5			4			4.5			5			1.76667
4wk	TA21 Right	R	None	0.5			1	normal		1.5			2			2.5			3			4.5	7.9		5	8.1		5.5	5.9		6	3.1		6.25
4wk	TA17R	R	None	0.5			1	7.9		1.5	10.2		2	6.3		2.5			3			3.5			4			4.5			5			8.13333
4wk	TA22R	R	None	0.5			1			1.5			2	7.7		4	8.3		4.5	8		5	7.7		5.5	8.3		6	8.6		6.5	5.1		7.67143
time zero	TA31L			3			3.5			4	35.6		4.5	38		5	43.6		5.5	40.8		6	37		6.5									39
